# Supplementary material for: Loading and triggered release of cargo from hollow spherical gold nanoparticle superstructures
Source: Royal Society of Chemistry journal article supplement (doi:10.1039/c5ra15492h), 2015-01-01
Supplement: c5ra15492h1.pdf [file c5ra15492h1.pdf]

## Supporting Information

### **Loading and Triggered Release of Cargo from Hollow Spherical Gold Nanoparticle Superstructures**

*Chen Zhang, Thomas Brinzer, Chong Liu, Sean Garrett-Roe and Nathaniel L. Rosi\**

Department of Chemistry  
University of Pittsburgh  
219 Parkman Avenue, Pittsburgh, Pennsylvania 15260, United States  
E-mail: [nrosi@pitt.edu](mailto:nrosi@pitt.edu)

## METHODS

**Materials and Characterization.** All solvents and chemicals were obtained from commercial sources and used without further purification. 0.1 M HEPES buffer (HEPES = 4-(2-hydroxyethyl)-1-piperazineethanesulfonic acid) was made by directly diluting 1.0 M HEPES buffer (pH =  $7.3 \pm 0.1$ ; Fisher Scientific) with water (NANOpure, Barnstead Diamond<sup>TM</sup> System.; 18.2 M $\Omega$ ). TEAA buffer (TEAA = triethylammonium acetate; ~1.0 M in water; pH = 7.0; Sigma-Aldrich) was directly used. Peptide (AAAYSSGAPPMPF or AA-PEP<sub>Au</sub>) was synthesized and purified by New England Peptide with final purity of 99%. Reverse-phase high-pressure liquid chromatography (HPLC) was performed at ambient temperature with an Agilent 1200 liquid chromatographic system equipped with diode array and multiple wavelength detectors using a Grace Vydac protein C4 column (214TP1010, 1.0 cm  $\times$  25 cm). Transmission electron microscopy (TEM) samples were prepared by pipetting one drop of solution onto a 3-mm-diameter copper grid coated with carbon film. TEM was conducted on either a JEOL 200CX instrument operated at 200 kV and equipped with a Gatan CCD image system or FEI Morgagni 268 operated at 80kV and equipped with an AMT side mount CCD camera system. UV-Vis spectra were collected using an Agilent 8453 UV-Vis Spectrometer with a quartz cuvette (10 mm path length) at room temperature.

**Preparation of large spheres or DOX-loaded large spheres using *in situ* loading method.** C<sub>6</sub>-AA-PEP<sub>Au</sub> was synthesized according to the previously reported

method.<sup>1</sup> Lyophilized C<sub>6</sub>-AA-PEP<sub>Au</sub> ( $\sim 1.87 \times 10^{-8}$  mol) was completely dissolved in 110  $\mu$ L 0.1 M HEPES buffer (pH = 7.4) and 15  $\mu$ L 1.0 M TEAA buffer (pH = 7.0) in a plastic vial. (For DOX-loaded large spheres, 2  $\mu$ L 1 mg/mL aqueous doxorubicin hydrochloride solution was added and vortexed at this time.) This solution was allowed to incubate for 30 min. Thereafter, 4  $\mu$ L of aqueous 0.01 M chloroauric acid (HAuCl<sub>4</sub>) solution was added to the above solution. The mixture was immediately vortexed for 1 min. and then left undisturbed at room temperature for one day. For DOX-loaded spheres, the excess drug molecules were removed by centrifugation (13200 rpm, 20 min, 3X). Thereafter, the spheres were redispersed in 125  $\mu$ L of fresh buffer. Products from multiple syntheses were studied using TEM and UV-Vis spectroscopy.

**Preparation of medium spheres or DOX-loaded medium spheres using *in situ* loading method.** Lyophilized C<sub>6</sub>-AA-PEP<sub>Au</sub> ( $\sim 1.87 \times 10^{-8}$  mol) was completely dissolved in 125  $\mu$ L 0.1 M HEPES buffer (pH = 7.4) in a plastic vial. (For DOX-loaded medium spheres, 2  $\mu$ L 1 mg/mL aqueous doxorubicin hydrochloride solution was added and vortexed at this time.) This solution was allowed to incubate for 30 min. During the 30 min. incubation time, a fresh gold ion precursor solution was prepared: 0.1M chloroauric acid (HAuCl<sub>4</sub>) in 1.0 M triethylammonium acetate (TEAA; pH = 7.0) buffer was incubated for 10 min. at room temperature. Thereafter, this mixture was centrifuged (10 min, 5K rpm). After the 30 min. peptide solution incubation period, 0.7  $\mu$ L of the supernatant of the centrifuged gold ion precursor

solution was added to the peptide conjugate solution. The mixture was immediately vortexed for 1 min. and then left undisturbed at room temperature for one day. For DOX-loaded spheres, the excess drug molecules were removed by centrifugation (13200 rpm, 20 min, 3X). Thereafter, the spheres were redispersed in 125  $\mu$ L of fresh buffer. Products from multiple syntheses were studied using TEM and UV-Vis spectroscopy.

**Determination of DOX loading efficiency.** See Scheme S1, where  $m_0$  is the initial amount of DOX added,  $m_1$ ,  $m_2$ , and  $m_3$  are the amount of DOX washed away after centrifugation.

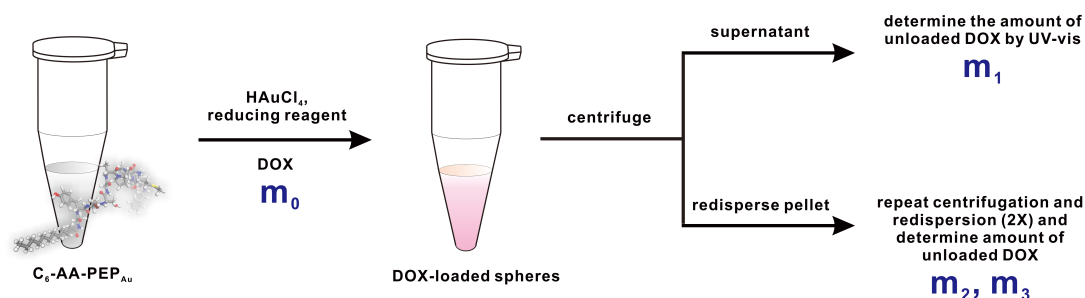

$$\text{Loading Efficiency} = \frac{m_0 - (m_1 + m_2 + m_3)}{m_0} \times 100\%$$

**Scheme S1.** Procedure used to determine DOX loading efficiency.

**Leakage Studies.** Leakage tests were performed in HEPES buffer (pH = 7.4), PBS buffer (pH = 7.4), and acetate buffer (pH = 5.0). At each time point, DOX-loaded spheres were centrifuged and the supernatant was analyzed for DOX using UV-Vis spectroscopy. All measurements were conducted in triplicate.

**Proteinase K Stability Studies.** To the sphere suspensions in either HEPES (pH = 7.4) or PBS buffer (pH = 7.4), 5  $\mu$ l of 20 mg/ml Proteinase K was directly added. The mixture was incubated at 37 °C for up to 27 h. UV-Vis spectra were collected at different time points.

**Enzyme treatment of DOX-loaded spheres.** To DOX-loaded sphere suspensions, 5  $\mu$ l of 20 mg/ml Proteinase K was directly added. The mixtures were incubated at 37 °C for up to 32 h. The release profiles of DOX were investigated in HEPES buffer (pH = 7.4) and PBS buffer (pH = 7.4). At each time point, the solution was centrifuged and the amount of DOX released in the supernatant was determined by comparing its absorbance at 485 nm to a DOX calibration curve. After each time point, the remaining solid was re-dispersed in fresh buffer solution containing 5  $\mu$ l of 20 mg/ml Proteinase K (~1-2 seconds of sonication were employed for better dispersion).

**Laser treatment of spheres or DOX-loaded spheres.** To the spheres or DOX-loaded sphere suspensions, laser irradiation at 805 nm was applied for different lengths of time. The output from a commercial Ti:Sapphire laser system (Coherent Vitesse / Coherent Legend Elite, 805 nm, 100 fs, 5 kHz) was directed through a 1 cm diameter iris immediately before the sample. Average laser power was measured at the sample, using a thermopile detector (Coherent PowerMax). The 2.59 W average power is

0.660 mJ·cm<sup>-2</sup> / pulse and the 1.25 W average power is 0.318 mJ·cm<sup>-2</sup> / pulse.

Samples were analyzed via TEM and UV-Vis spectroscopy after laser irradiation.

## Supplementary Data

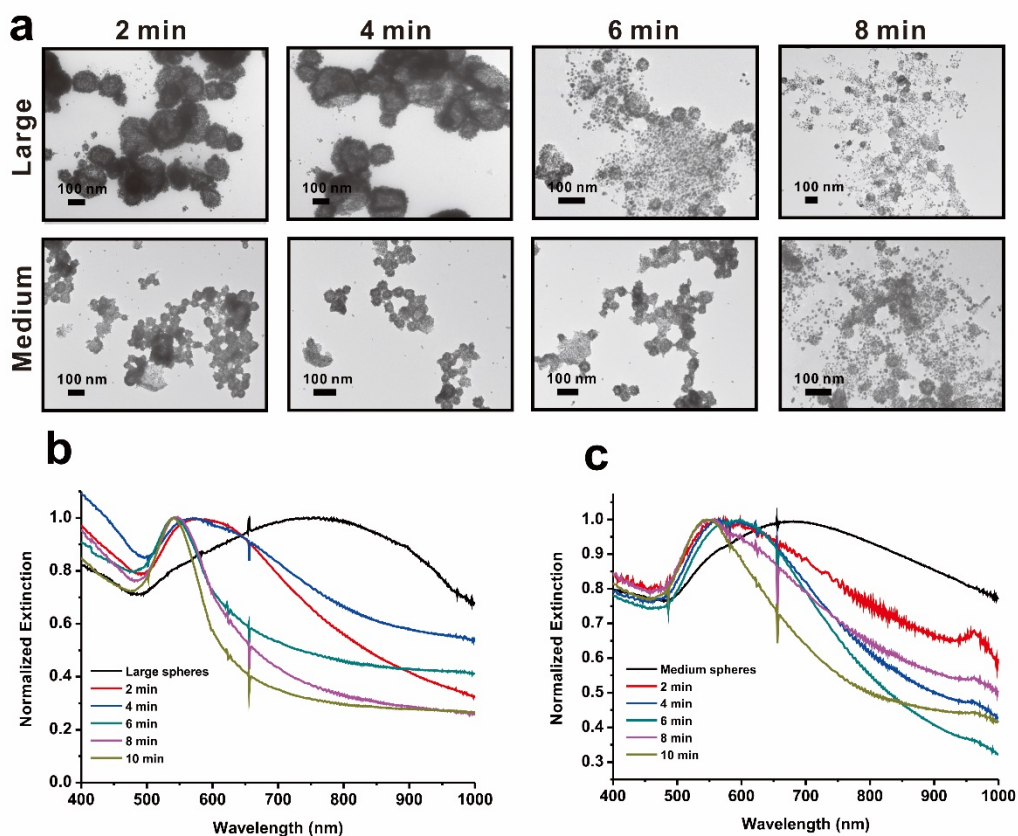

**Figure S1.** (a) TEM images of large spheres and medium spheres at different time points during irradiation with 805 nm laser at 2.59 W. (b) UV-Vis spectra of large spheres at different time points after irradiation with 805 nm laser at 2.59 W. (c) UV-Vis spectra of medium spheres at different time points after irradiation with 805 nm laser at 2.59 W.

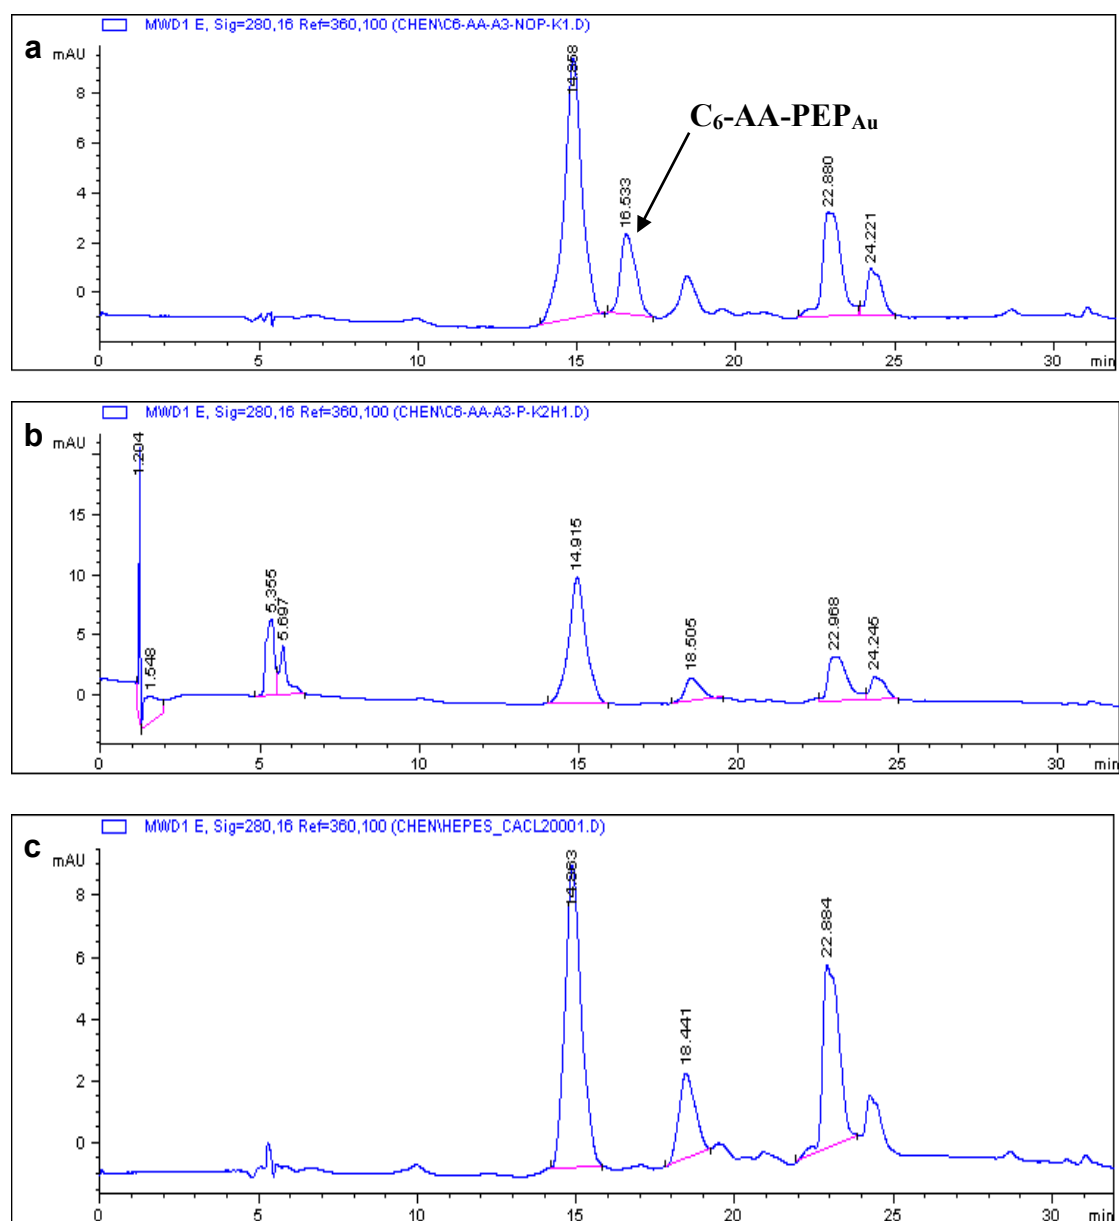

**Figure S2.** HPLC traces of: a)  $C_6$ -AA-PEP<sub>Au</sub> in 0.1 M HEPES buffer (pH =7.4); b)  $C_6$ -AA-PEP<sub>Au</sub> in 0.1 M HEPES buffer (pH = 7.4) after the addition of proteinase K for one day at 37 °C; c) 0.1 M HEPES buffer (pH = 7.4). The retention time for  $C_6$ -AA-PEP<sub>Au</sub> is around 16.5 min.



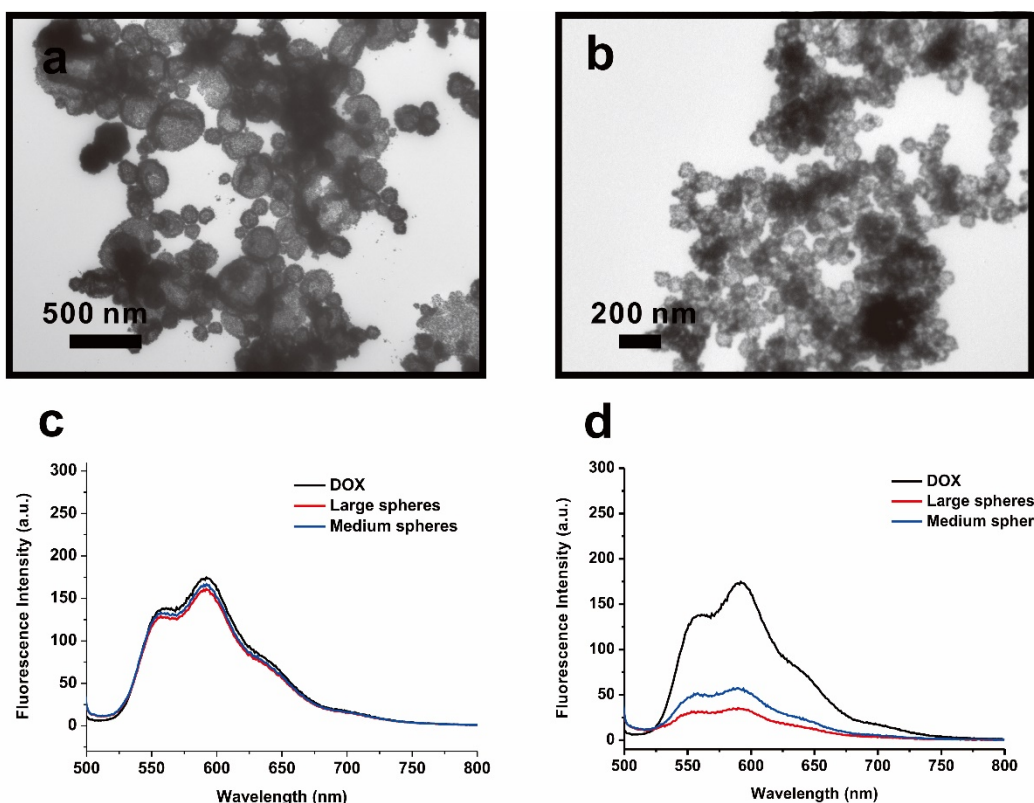

**Figure S3.** TEM images of DOX-loaded (a) large spheres and (b) medium spheres prepared using *in situ* loading method after removing excess drug molecules; (c) Fluorescence spectra of DOX-loaded large spheres and medium spheres using post-synthetic loading method without removing excess drug molecules; (d) Fluorescence spectra of DOX-loaded large spheres and medium spheres using *in situ* loading method without removing excess drug molecules. In both spectra, the black ‘DOX’ line is the spectrum for free DOX prior to loading into the spheres.

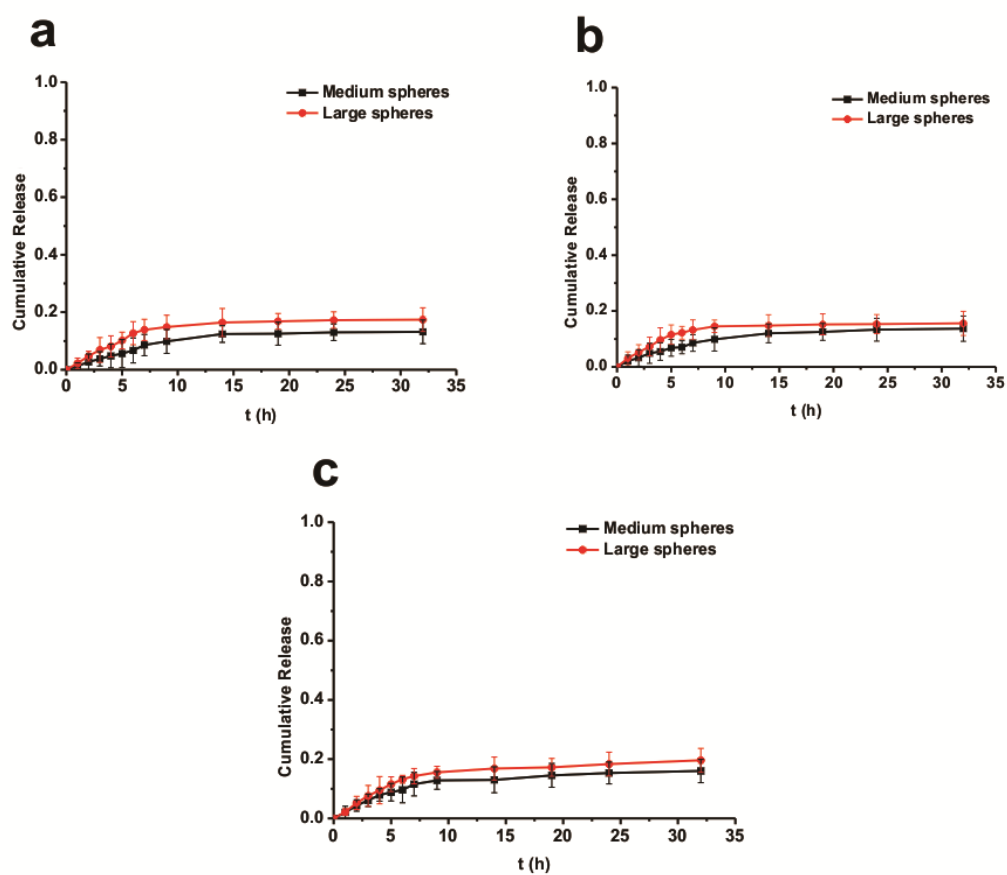

**Figure S4.** DOX leakage tests from large spheres and medium spheres in different buffers: (a) HEPES buffer (pH = 7.4); (b) PBS buffer (pH = 7.4); (c) Acetate buffer (pH = 5.0).

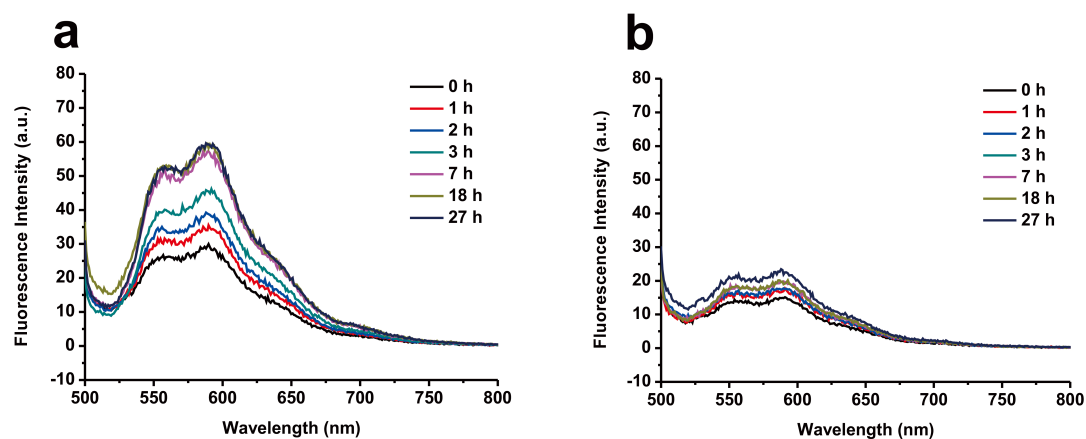

**Figure S5.** Time-dependent fluorescence spectra after the addition of proteinase K for DOX-loaded (a) large spheres and (b) medium spheres.

## References:

1. C. Zhang, Y. Zhou, A. Merg, C. Song, G. C. Schatz and N. L. Rosi, *Nanoscale*, 2014, **6**, 12328-12332.
